# Supplementary material for: Complete zwitterionic double network hydrogels with great toughness and resistance against foreign body reaction and thrombus
Source: Royal Society of Chemistry journal article supplement (doi:10.1039/d0tb01163k), 2020-01-01
Supplement: d0tb01163k1.pdf [file d0tb01163k1.pdf]

Supporting information for *Journal of Materials Chemistry B*

# Complete zwitterionic double network hydrogels with great toughness and resistance against foreign body reaction and thrombus

*Kang-Ting Huang<sup>a</sup>, Pai-Shan Hsieh<sup>b</sup>, Lien-Guo Dai<sup>c</sup>, Chun-Jen Huang<sup>a,d,e,\*</sup>*

<sup>a</sup> Department of Biomedical Sciences and Engineering, National Central University, Jhong-Li, Taoyuan 320, Taiwan

<sup>b</sup> Division of Plastic and Reconstructive Surgery, Department of Surgery, Tri-Service General Hospital, National Defense Medical Center, Taiwan

<sup>c</sup> Department of Orthopedics, Min-Sheng General Hospital, Taoyuan 330, Taiwan

<sup>d</sup> Department of Chemical & Materials Engineering, National Central University, Jhong-Li, Taoyuan 320, Taiwan

<sup>e</sup> R&D Center for Membrane Technology, Chung Yuan Christian University, 200 Chung Pei Rd., Chung-Li City 32023, Taiwan

\* Email: [cjhuang@ncu.edu.tw](mailto:cjhuang@ncu.edu.tw) (C.-J. H.)

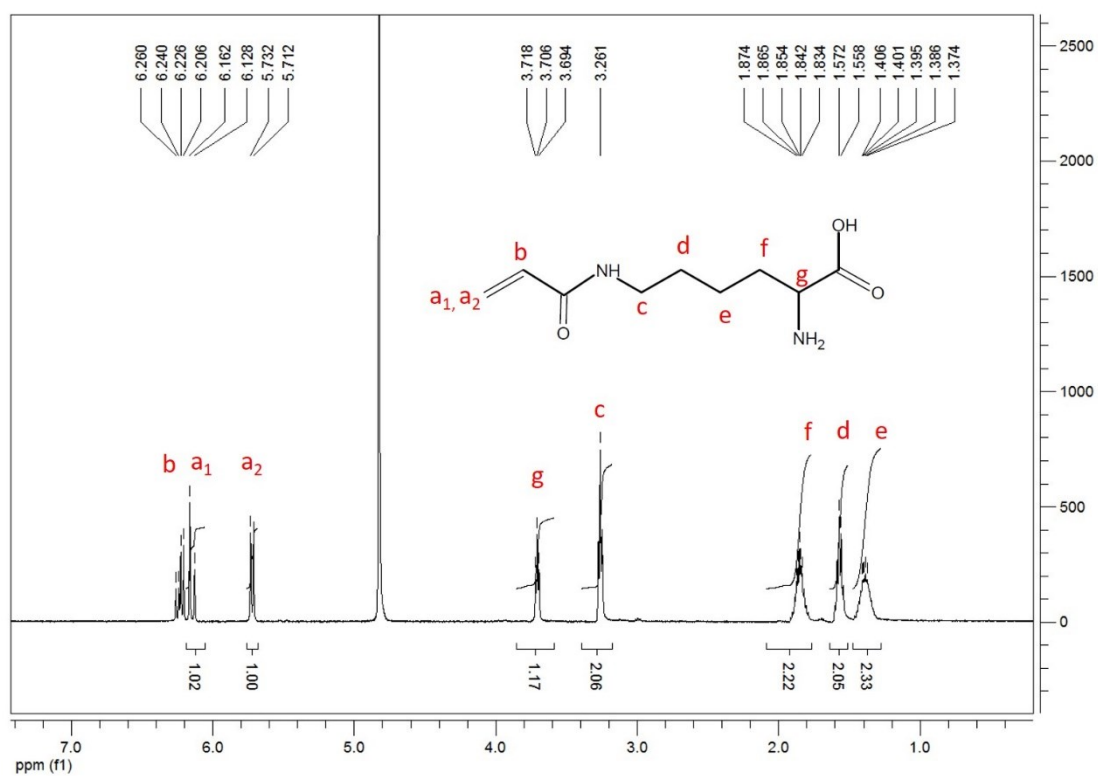

**Fig. S1**  $^1\text{H}$  NMR characterization of LysAA.

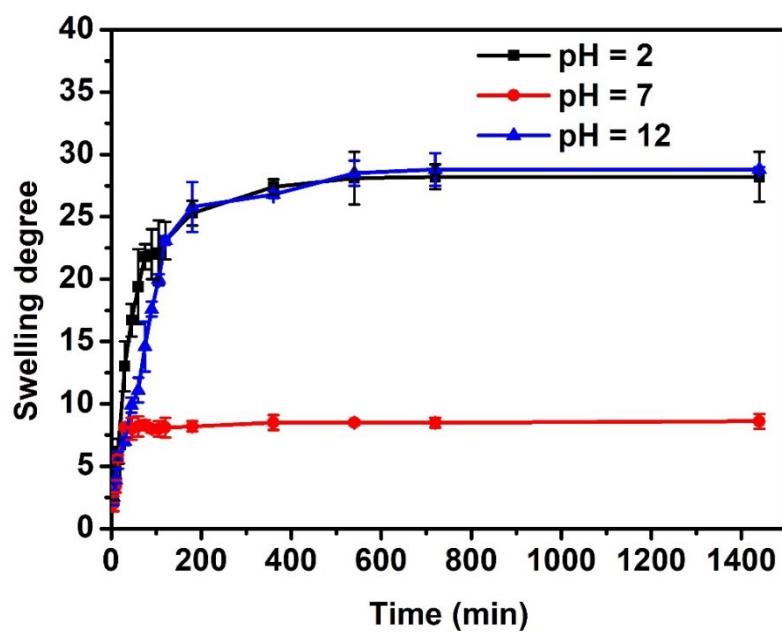

**Fig. S2** The kinetic swelling behavior of PLysAA1-4 framework in aqueous solution at pH of 2, 7, and 12.

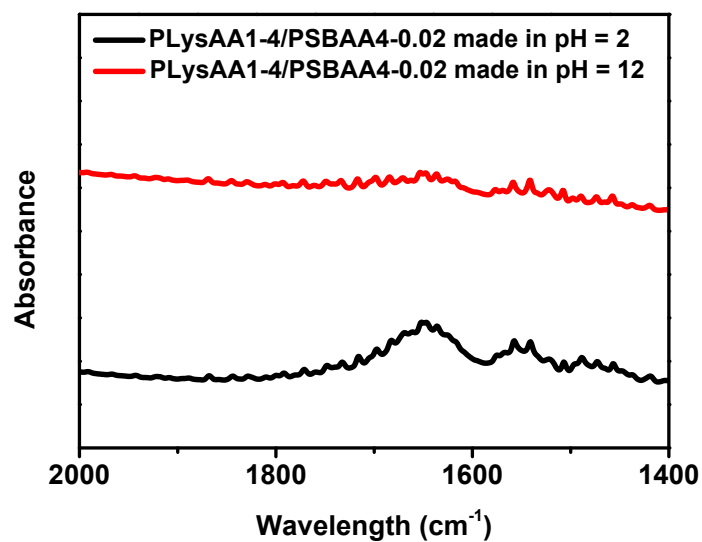

**Fig. S3** FTIR spectra of the PLysAA1-4/PSBAA4-0.02 hydrogels under acidic and alkaline fabrication.

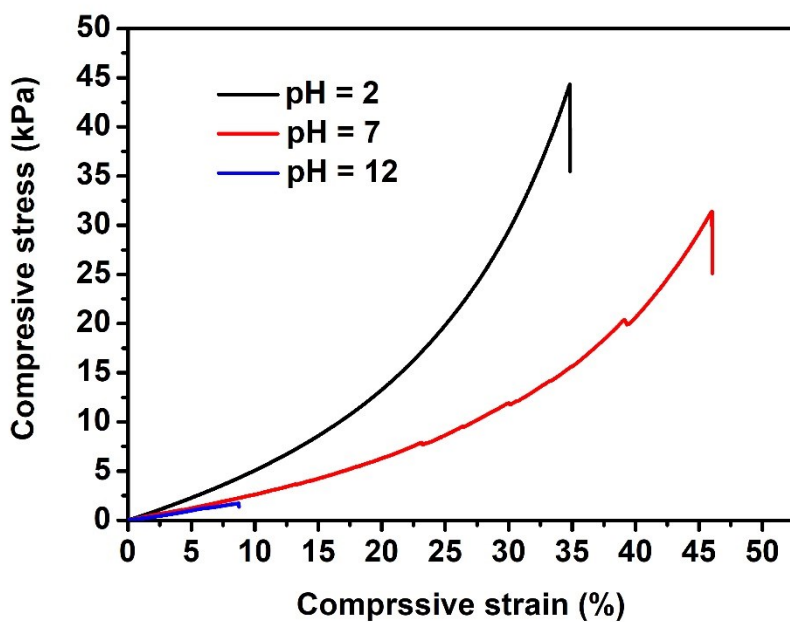

**Fig. S4** Compressive stress-strain curves of PLysAA1-4 hydrogels under acidic, neutral, and alkaline fabrication.

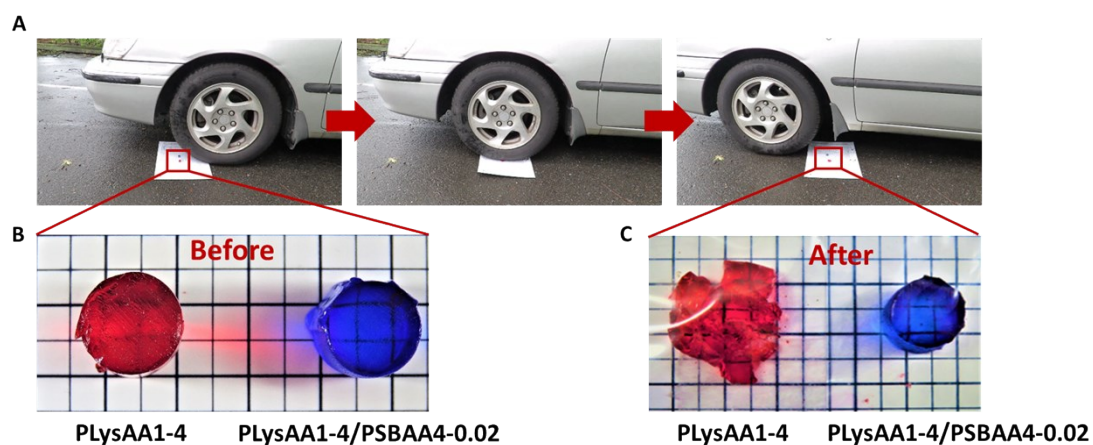

**Fig. S5** PLysAA1-4 and PLysAA1-4/PSBAA4-0.02 hydrogels were run over by a car. (A) The process of car run-over the hydrogels. (B) The integrities of hydrogels before the car run-over. (C) The integrities of hydrogels after the car run-over.

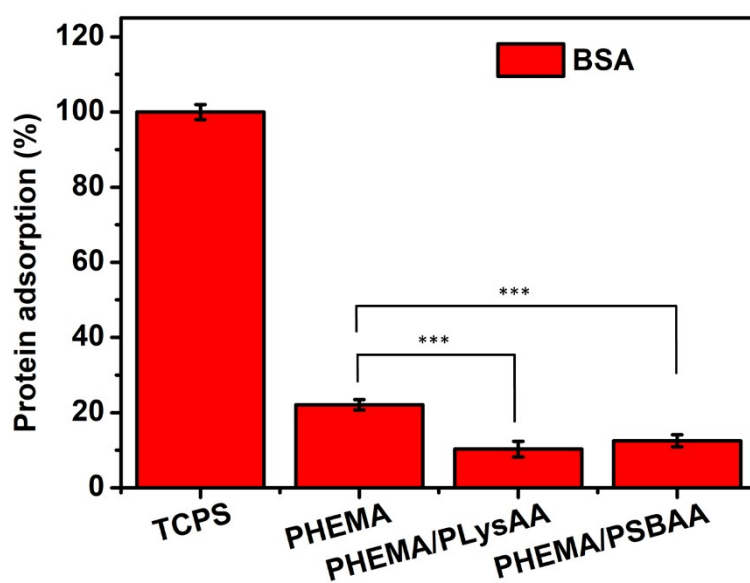

**Fig. S6** BSA adsorption on PHEMA, PHEMA/PLysAA and PHEMA/PSBAA with respect to that on TCPS. \*\*\* represents  $p < 0.001$ .

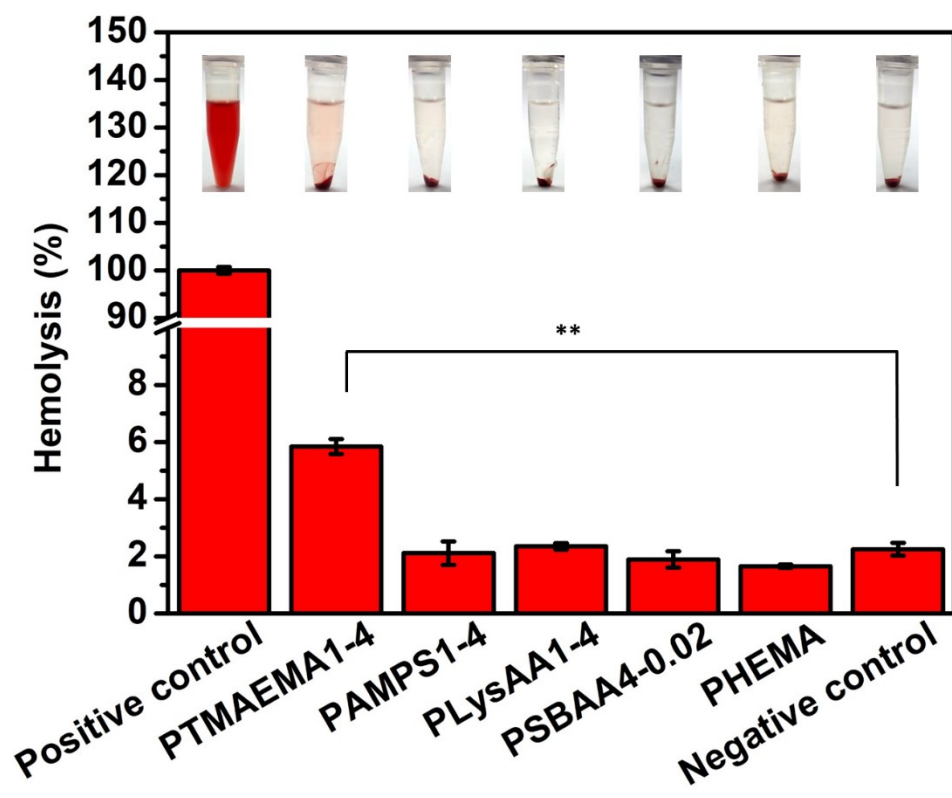

**Fig. S7** Hemolysis of RBCs solution in presence of single network hydrogels. \*\* represents  $p < 0.01$ .
